# Supplementary material for: Deficiency of Krüppel-like factor 15 activates β-catenin and is involved in the development of osteoarthritis
Source: Research Square preprint supplement (doi:10.21203/rs.3.rs-8429330/v1), 2026-01-08
Supplement: Supplementary file 1 [file dcb65b18cf3c426ccc2aab97.docx]

Supplemental Table 1 Primer sequences.

| **Mouse target gene** | **Sequence** |
| --- | --- |
| GAPDH | F 5´ - AGGTCGGTGTGAACGGATTTG - 3´ |
| R 5´ - TGTAGACCATGTAGTTGAGGTCA - 3´ |
| β-catenin | F 5´ - GTGCAATTCCTGAGCTGACA- 3´ |
| R 5´ - CTTAAAGATGGCCAGCAAGC - 3´ |
| Axin2 | F 5´ - GAGTAGCGCCGTGTTAGTGACT - 3´ |
| R 5´ - TCACAGCCACACTTCTCCAG- 3´ |
| ADAMTS5 | F 5´ - TGAGCTTTGGCAACCTTCAAATC - 3´ |
| R 5´ - AGGTCCCAAACGGCTCAGTTC - 3´ |
| MMP13 | F 5´ - GGAAACCAGGTCTGGAGATATGA - 3´ |
| R 5´ - TGGAATTTGCTGGCATGACG - 3´ |
| SOX9 | F 5´ - AATGCTATCTTCAAGGCGCTG - 3´ |
| R 5´ - GGACCCTGCGATTGCCCAG - 3´ |
| Col2A1 | F 5´ - GCTGGTGAAGAAGGCAAACGAG - 3´ |
| R 5´ - CCATCTTGACCTGGGAATCCAC - 3´ |
